# Supplementary material for: Nanoparticle-enhanced multi-target RNAi in Myzus persicae: molecular mechanisms, cross-kingdom sRNA transfer, and efficacy for sustainable pest management
Source: Research Square preprint supplement (doi:10.21203/rs.3.rs-7480243/v1), 2025-09-11
Supplement: Supplementary file 1 [file 18989171b0929db776824e77.xlsx]

## Sheet: TABLE
Treatment type	Aphid species	Target gene(s)	Silencing timing	Silencing rate	Mortality timing	Mortality rate	Delivery	Carrier	Bioassay T/HR	Host plant	Dose	dsRNA length (bp)	Reference
HIGS (A. thaliana)	Myzus persicae	MpC002 and MpPIntO2	4 d and 8 d of exposure	Maximal reduction of gene expression was ~70%	NA	dsMpC002 transgenic plants experienced a 60% decline in aphid reproduction, 40% decline of aphids reared on dsRack1 and dsMpPIntO2 plants	HIGS (A. thaliana)	NA	Lab conditions	A. thaliana	Transgenic	309 Rack-1; 710 MpC002	Coleman, A.D.; Wouters, R.H.; Mugford, S.T.; Hogenhout, S.A. Persistence and transgenerational effect of plant-mediated RNAi in aphids. J. Exp. Bot. 2015, 66, 541–548.
HIGS (plastid-mediated tobacco; transplastomic)	Myzus persicae	MpDhc64C	Not specified as %/time	Functional silencing (feeding/weight/fecundity)	Whole-plant assay period	Reduced survival, impaired fecundity	HIGS (transplastomic tobacco)	NA	Chamber	Tobacco	High plastid expression	hpRNA >200	Dong, Y.; Wu, M.; Zhang, Q.; Fu, J.; Loiacono, F.V.; Yang, Y.; Wang, Z.; Li, S.; Chang, L.; Bock, R.; et al. Control of a sap-sucking insect pest by plastid-mediated RNA interference. Mol. Plant 2022, 15, 1176–1191.
HIGS (transgenic Arabidopsis/Nicotiana)	Myzus persicae	MpC002, MpPIntO2 (Mp2), MpPIntO1	Silencing validated; persistence and transgenerational effects shown	knocked down by up to 60% on transgenic N. benthamiana and A. thaliana	16 d in A. thaliana	Reduced reproduction (functional)	HIGS (transgenic N. benthamiana, A. thaliana)	NA	leaf disk N. benthamiana, plants A. thaliana	N. benthamiana	Constitutive expression	3009 Rack-1; 710 MpC002	Pitino, M.; Coleman, A.D.; Maffei, M.E.; Ridout, C.J.; Hogenhout, S.A. Silencing of aphid genes by dsRNA feeding from plants. PLoS ONE 2011, 6, e25709.
HIGS (transgenic wheat)	Sitobion avenae	SmDSR33 (salivary secretion protein)	Not disclosed	up to 75%	9–18 days after feeding	up to 90% by 18 days in one transgenic line; survival, fecundity, longevity reduced	HIGS (transgenic wheat)	NA	Chamber/greenhouse	Wheat	Constitutive expression	439	Zhang J, Li H, Zhong X, Tian J, Segers A, Xia L and Francis F (2023) Silencing an aphid-specific gene SmDSR33 for aphid control through plant-mediated RNAi in wheat. Front. Plant Sci. 13:1100394. doi: 10.3389/fpls.2022.1100394
HIGS (transgenic wheat)	Sitobion avenae	CHS1; Gqα; lmf2-like	Silencing validated	45.32-50.29%		46.7% and 56.2% lower number	HIGS (transgenic wheat)	NA	Chamber/greenhouse	Wheat	Constitutive expression	550	Zhao, Y.; Sui, X.; Xu, L.; Liu, G.; Lu, L.; You, M.; Xie, C.; Li, B.; Ni, Z.; Liang, R. Plant-mediated RNAi of grain aphid CHS1 gene confers common wheat resistance against aphids. Pest Manag. Sci. 2018, 74, 2754–2760.
HIGS (transgenic wheat)	Sitobion avenae	lmf2-like	5-10 d	27.6- 57.6%	15-17 d	40-43%	HIGS (transgenic wheat)	NA	Chamber/greenhouse	Wheat	Constitutive expression	543	Xu, L.; Hou, Q.; Zhao, Y.; Lu, L.; Li, B.; Ni, Z.; Liang, R. Silencing of a lipase maturation factor 2-like gene by wheat-mediated RNAi reduces the survivability and reproductive capacity of the grain aphid, Sitobion avenae. Arch. Insect Biochem. Physiol. 2017, 95, e21392.
HIGS (wheat; zinc finger)	Sitobion avenae	SaZFP	Silencing from day 2; transgenerational	Functional	2–18 days	≈50% by day 2; ≈80% by days 8–18	HIGS (wheat)	NA	Greenhouse/field as applicable	Wheat	Constitutive expression	?200	Sun, Y.; Sparks, C.; Jones, H.; Riley, M.; Francis, F.; Du, W.; Xia, L. Silencing an essential gene involved in infestation and digestion in grain aphid through plant-mediated RNA interference generates aphid-resistant wheat plants. Plant Biotechnol. J. 2019, 17, 852–854.
Feeding (artificial diet)	Acyrthosiphon pisum	Hunchback	7 d	0.54	7 d	up to 45.0%	Feeding (artificial diet)	None	Chamber/greenhouse	NA	0.75 mg/ml	240	Mao, J.; Zeng, F. Feeding-based RNA interference of a gap gene is lethal to the pea aphid, Acyrthosiphon pisum. PLoS ONE 2012, 7, e48718.
Feeding (artificial diet)	Acyrthosiphon pisum	v-ATPase	Silencing not quantified	Silencing not quantified	Not reported	High mortality qualitatively reported		None		NA	up to 0.5 mg/mL	185	Whyard, S.; Singh, A.D.; Wong, S. Ingested double-stranded RNAs can act as species-specific insecticides. Insect Biochem. Mol. Biol. 2009, 39, 824–832.
Feeding (artificial diet; time-course)	Schizaphis graminum	SgC002 (siRNAs)	7 d	0.9	7 d	0.6	Feeding (artificial diet)	None	Lab	wheat	20 ng/μL	siRNA 23 nt	ZHANG, Y.; FAN, J.; SUN, J.; CHEN, J. Cloning and RNA Interference Analysis of the Salivary Protein C002 Gene in Schizaphis Graminum. J. Integr. Agric. 2015, 14 (4), 698–705. https://doi.org/10.1016/S2095-3119(14)60822-4.
Feeding (artificial diet; time-course)	Myzus persicae	MpNav (VGSC)	Not time-quantified	Functional	d2–d7	34.7%(d2), 43.6%(d3), 58.2%(d4), 63.6%(d6), 65.7%(d7)	Feeding (artificial diet)	None	Lab	NA	µg/mL diet	?300	Tariq, K.; Ali, A.; Davies, T.G.E.; Naz, E.; Naz, L.; Sohail, S.; Hou, M.; Ullah, F. RNA interference-mediated knockdown of voltage-gated sodium channel (MpNav) gene causes mortality in peach-potato aphid, Myzus persicae. Sci. Rep. 2019, 9, 5291.
Feeding (artificial diet; time-course)	Aphis gossypii	CHS1	48–72h significant	Noted significant	24–72h	43%(24h), 47%(48h), 59%(72h)	Feeding (artificial diet)	None	Lab	NA	µg/mL diet	?450-550	Ye, C.; Jiang, Y.D.; An, X.; Yang, L.; Shang, F.; Niu, J.; Wang, J.J. Effects of RNAi-based silencing of chitin synthase gene on moulting and fecundity in pea aphids (Acyrthosiphon pisum). Sci. Rep. 2019, 9, 3694.
Feeding + stem-dipping	Aphis citricidus	AChE1, AChE2	Silencing confirmed	Not %	Bioassay period	Increased susceptibility to malathion/carbaryl; higher mortality with AChE1 knockdown	Feeding via stem-dip leaves	None	Lab	Citrus leaves	mg/L range	?400-600	Mou, X.; Yuan, G.R.; Jiang, H.B.; Liu, Z.; Wang, J.J. Functional characterization of two acetylcholinesterase genes in the brown citrus aphid using heterologous expression and RNA interference. Pestic. Biochem. Physiol. 2017, 138, 76–83.
Feeding + stem-dipping	A. citricidus	AcVg, AcVgR	Silencing confirmed	AcVg up to 77% (alates), 46% (apterous); AcVgR by 33% (apterous adults), 46% (alates)	168 h	mortality: 42% dsVg 67% dsVgR	Feeding + stem-dipping	None	feeding on citrus treated with dsRNA	Citrus leaves	300 ug/citrus stem	Vg: 3987, VgR: 1124	Shang, F.; Niu, J. Z.; Ding, B. Y.; Zhang, Q.; Ye, C.; Zhang, W.; Smagghe, G.; Wang, J. J. Vitellogenin and Its Receptor Play Essential Roles in the Development and Reproduction of the Brown Citrus Aphid, Aphis (Toxoptera) Citricidus. Insect Mol. Biol. 2018, 27 (2), 221–233. https://doi.org/10.1111/imb.12366.
Microinjection (time-resolved)	Acyrthosiphon pisum	Calreticulin; Cathepsin-L	Onset d1; peak d5; decline d7	≈35–40% max (d5)	1–2 days	30–45% mortality within 2 days post-injection	Microinjection	None	Lab	NA	ng per aphid	?300-500	Jaubert-Possamai, S.; Le Trionnaire, G.; Bonhomme, J.; Christophides, G.K.; Rispe, C.; Tagu, D. Gene knockdown by RNAi in the pea aphid Acyrthosiphon pisum. BMC Biotechnol. 2007, 7, 63.
SIGS	Schizaphis graminum	SgC002	24-48h	0.6	5 d	25% reduction nymph production	Spraying aphids+leaves	star polycation (SPc)	Lab	wheat	200 ng/μL	447	Zhang, Y.; Liu, X.; Francis, F.; Xie, H.; Fan, J.; Wang, Q.; Liu, H.; Sun, Y.; Chen, J. The Salivary Effector Protein Sg2204 in the Greenbug Schizaphis Graminum Suppresses Wheat Defence and Is Essential for Enabling Aphid Feeding on Host Plants. Plant Biotechnol. J. 2022, 20 (11), 2187–2201. https://doi.org/10.1111/pbi.13900.
SIGS (microinjection, aerosolized siRNA–nanoparticles)	A. glycines; A. pisum; Schizaphis graminum	tor, bcat	Knockdown confirmed (moderate)	“Modest but significant”, up to 50%	Phenotypes observed in exposure window	Phenotypic impacts low (not % lethality-focused)	Aerosolized siRNA-nanoparticles	Nanoparticles (liquid perfluorocarbon)	Lab	Assorted/exposure	Aerosol exposure	siRNA 21-25 nt	Thairu, M.W.; Skidmore, I.H.; Bansal, R.; Novakova, E.; Hansen, T.E.; Li-Byarlay, H.; Wickline, S.A.; Hansen, A.K. Efficacy of RNA interference knockdown using aerosolized siRNAs bound to nanoparticles in three diverse aphid species. Insect Mol. Biol. 2017, 26, 356–368.
SIGS (nanocarrier dsRNA; wheat)	Schizaphis graminum	Sg2204 (salivary effector)	Silencing validated	Not %	Post-treatment	Survival, fecundity, feeding reduced	SIGS with nanocarrier	Nanocarrier (polymer)	Lab/greenhouse	Wheat	Spray concentrations per study	?300-500	Zhang, Y.; Liu, X.; Francis, F.; Xie, H.; Fan, J.; Wang, Q.; Liu, H.; Sun, Y.; Chen, J. The salivary effector protein Sg2204 in the greenbug Schizaphis graminum suppresses wheat defence and is essential for enabling aphid feeding on host plants. Plant Biotechnol. J. 2022, 20, 2187–2201.
SIGS (spray + nanocarrier; soybean aphid)	Aphis glycines	TREH, ATPD, ATPE, CHS1	Post-spray silencing confirmed	Gene-dependent	Post-spray (timeline as bioassay)	Highest with dsATPD+dsCHS1 (quantified high mortality)	Spray + cationic dendrimer nanocarrier	Cationic dendrimer	Lab/greenhouse	Soybean	Spray-to-runoff (µg/mL)	?400-550	Yan, S.; Qian, J.; Cai, C.; Ma, Z.; Li, J.; Yin, M.; Ren, B.; Shen, J. Spray method application of transdermal dsRNA delivery system for efficient gene silencing and pest control on soybean aphid Aphis glycines. J. Pest Sci. 2020, 93, 449–459.
SIGS (topical dsRNA; dose/time-resolved)	Aphis gossypii	ATPE, IAP, Cat, ilvE	≥12h significant; peak 72h	63.0–88.1% at 72h (gene-dependent)	72h assessment	48.33% (ATPE), 83.33% (IAP), 76.67% (Cat), 60.00% (ilvE)	Topical dsRNA on leaf; likely surfactant aid	None (topical); formulation optimized	Lab conditions	Cucurbit host (as per paper)	As per study (µg/mL range); mortality at 72h	200-600 (typical); exact per target	Zhan, C.; Jiao, B.; Xu, L.; Peng, Y.; Zhao, Y. Topical RNA Interference Induces Mortality in the Cotton–Melon Aphid Aphis Gossypii with No Adverse Effect on the Predator Propylea Japonica. Insects 2025, 16 (3), 1–14. https://doi.org/10.3390/insects16030276.
SIGS (Topical RNAi)	Acyrthosiphon pisum; Aphis citricidus; Myzus persicae	Cuticle protein 19 (CP19)	4 d	39.3%-64.2%	4d	45.8%-55.8%	Spraying detached leaves	None	Lab/chamber	Citrus, Brassica, bean	Embeeding in 1500 ng/μL	360	Shang, F.; Ding, B.; Ye, C.; Yang, L.; Chang, T.; Xie, J.; Tang, L.; Niu, J.; Wang, J. Evaluation of a Cuticle Protein Gene as a Potential RNAi Target in Aphids. Pest Manag. Sci. 2020, 76 (1), 134–140. https://doi.org/10.1002/ps.5599.
SIGS	Sitobion avenae	SHP (structural sheath protein)	5 d	0.6	NA	Not recorded	Spraying detached leaves	None	Lab/chamber	Barley	20 ng/μl	490	Biedenkopf, D.; Will, T.; Knauer, T.; Jelonek, L.; Furch, A.C.U.; Busche, T.; Koch, A. Systemic spreading of exogenous applied RNA biopesticides in the crop plant Hordeum vulgare. ExRNA 2020, 2, 12.

## Sheet: META-ANALYSIS
	Meta-analysis of RNAi efficacy in aphid control: silencing and mortality parameters across delivery methods
	Fig. M1. Analysis of RNAi efficacy in aphid control showing silencing a by treatment type. Mean gene silencing efficacy reached 64.0% ± 14.5%, with the most successful approaches achieving up to 90% transcript reduction (HIGS at 18 days). The range of observed efficacies (40-90%) reflects both technical variations in dsRNA delivery and inherent species-specific differences in RNAi machinery effic…
	Fig. M2. Correlation between RNAi silencing efficacy and mortality efficacy showing strong positive relationship (r=0.769) across different treatment types. Analysis of the comprehensive dataset reveals mean silencing efficacies of 64.0% ± 14.5% (range: 40-90%) and mortality rates of 59.6% ± 17.4% (range: 25-90%). Timing analysis shows that gene silencing occurs within an average of 4.5 days, whi…
	Fig. M3. RNAi silencing and mortality efficacy by aphid species showing species-specific responses to RNAi treatments. The analysis reveals substantial species-specific variation in RNAi susceptibility, with critical implications for pest management strategies (Fig. 3). Schizaphis graminum demonstrates the highest silencing efficacy (75.0% ± 21.2%) but paradoxically shows lower mortality rates (4…
